# Supplementary material for: Comprehensive rehabilitation with integrative medicine for subacute stroke: A multicenter randomized controlled trial
Source: PubMed Central journal article supplement (PMC4865744; doi:10.1038/srep25850), 2016-05-13
Supplement: srep25850-s1.pdf [file srep25850-s1.pdf]

**Comprehensive rehabilitation with integrative medicine for subacute stroke: A multicenter randomized controlled trial**

Jianqiao Fang Ph.D. M.D.<sup>\*1,2</sup> fangjianqiao7532@163.com

Lifang Chen Ph.D. M.D.<sup>1</sup> clfang@163.com

Ruijie Ma Ph.D. M.D.<sup>1</sup> maria7878@sina.com

Crystal Lynn Keeler Ph.D.<sup>2</sup> Crystal.clk@gmail.com

Laihua Shen M.D.<sup>3</sup> slh86ly@163.com

Yehua Bao M.D.<sup>4</sup> byh@hz.cn

Shouyu Xu Ph.D. M.D.<sup>5</sup> overnightjo@msn.com

<sup>1</sup> Department of Acupuncture, The Third Affiliated Hospital of Zhejiang Chinese Medical University, 219 Moganshan Road, Xihu District, Hangzhou City, Zhejiang Province 310005, China

<sup>2</sup> Zhejiang Chinese Medical University, 548 Binwen Road, Binjiang District, Hangzhou City, Zhejiang Province 310053, China

<sup>3</sup> Department of Acupuncture & Encephalopathy, Jiaxing Hospital of Traditional Chinese Medicine. 1501 Zhong shan East Road, Jiaxing City, Zhejiang Province 310012, China

<sup>4</sup> Department of Acupuncture & Rehabilitation, Hangzhou Hospital of Traditional Chinese Medicine. 453 Tiychang Road, Xihu District, Hangzhou City, Zhejiang Province 310007, China

<sup>5</sup> Department of Rehabilitation, The Third Affiliated Hospital of Zhejiang Chinese Medical University, 219 Moganshan Road, Xihu District, Hangzhou City, Zhejiang Province 310005, China

\*Corresponding. fangjianqiao7532@163.com

Supplemental Table S1. Variables at Different Stages, Mean (SD)

| Variables | Group(n) | Week 0       | Week 4       | Week 8         | Week 20        |
|-----------|----------|--------------|--------------|----------------|----------------|
| MBI       | IMR(176) | 39.11(15.56) | 52.47(16.93) | 66.04(17.09)** | 75.36(16.64)** |
|           | CR(172)  | 39.03(17.36) | 49.58(18.30) | 59.56(19.62)   | 66.64(19.60)   |
| NIHSS     | IMR(176) | 10.06(3.88)  | 7.92(3.87)   | 5.63(3.39)**   | 3.69(2.85)**   |
|           | CR(172)  | 10.61(4.35)  | 8.76(4.54)   | 6.87(4.08)     | 5.67(3.82)     |
| FMA       | IMR(176) | 43.86(16.07) | 56.20(18.15) | 69.01(17.75)** | 77.44(16.84)** |
|           | CR(172)  | 44.23(18.52) | 52.66(19.80) | 61.55(19.19)   | 68.68(18.03)   |
| MMSE      | IMR(62)  | 16.02(3.57)  | 16.66(3.63)  | 19.03(4.04)    | 21.42(4.47)*   |
|           | CR(69)   | 15.70(3.43)  | 16.16(3.25)  | 18.28(3.56)    | 19.71(3.69)    |
| MoCA      | IMR(62)  | 14.65(3.10)  | 15.11(3.06)  | 17.21(3.18)    | 19.97(3.00)**  |
|           | CR(69)   | 13.96(3.14)  | 14.46(2.92)  | 16.17(2.66)    | 17.77(2.74)    |
| HAMD      | IMR(76)  | 22.97(4.42)  | 21.74(4.45)  | 19.80(4.16)    | 15.78(4.09)*   |
|           | CR(77)   | 23.06(6.50)  | 22.57(6.33)  | 20.99(5.47)    | 17.69(5.32)    |
| SDS       | IMR(76)  | 64.93(5.40)  | 63.42(6.47)  | 57.77(7.87)    | 48.80(9.34)*   |
|           | CR(77)   | 63.95(6.32)  | 63.28(6.68)  | 59.60(6.78)    | 53.61(8.68)    |

\*  $P < 0.05$ , compared with CR group; \*\*  $P < 0.01$ , compared with CR group.

Supplemental Table S2. Adverse Events Reported in Study

|                              | IMR (n=180) | CR (n=180) |
|------------------------------|-------------|------------|
| AEs                          | 103         | 107        |
| AE relatedness to treatment  |             |            |
| Not related                  | 96          | 99         |
| Possibly/definitely          | 2           | 2          |
| Unknown                      | 5           | 6          |
| Study treatment              |             |            |
| Temporarily interrupted      | 2           | 3          |
| Permanently discontinued     | 0           | 0          |
| SAEs                         | 13          | 11         |
| SAE criteria                 |             |            |
| Death                        | 0           | 0          |
| Life-threatening             | 0           | 0          |
| Prolonged hospitalization    | 8           | 8          |
| Resulted in disability       | 1           | 1          |
| Important medical event      | 2           | 1          |
| Other                        | 2           | 1          |
| SAE relatedness to treatment |             |            |
| Not related                  | 11          | 10         |
| Possibly/definitely          | 1           | 0          |
| Unknown                      | 1           | 1          |
| Study treatment              |             |            |

|                          |   |   |
|--------------------------|---|---|
| Temporarily interrupted  | 1 | 2 |
| Permanently discontinued | 1 | 2 |
| Five most common SAEs    |   |   |
| Pneumonia                | 6 | 5 |
| Urinary tract infection  | 4 | 4 |
| Heart failure            | 2 | 1 |
| Acute heart disease      | 1 | 0 |
| Recurrent stroke         | 0 | 1 |

---

Abbreviations: AE, adverse event; SAE, serious adverse event (FAS).

Supplemental Table S3. Chinese Pinyin, Latin, and Common Names of Chinese Herbs in the Study

| Chinese Pinyin Names | Latin Names                                                    | Common Names                                                   |
|----------------------|----------------------------------------------------------------|----------------------------------------------------------------|
| Tian Ma              | <i>Gastrodia elata</i> Bl                                      | Rhizoma Gastrodiae                                             |
| Gou Teng             | <i>Uncaria rhynchophylla</i> (Miq.)                            | Ramulus Uncariae Cum Uncis                                     |
| Shi Jue Ming         | <i>Haliotis diversicolor</i> Reeve                             | Concha Haliotidis                                              |
| Shan Zhi Zi          | <i>Gardenia jasminoides</i> Ellis                              | Fructus Gardeniae                                              |
| Huang Qin            | <i>Scutellaria baicalensis</i> Georgi                          | Radix Scutellariae                                             |
| Niu Xi               | <i>Cyathula officinalis</i> Kuan (Achyranthes bidentata Blume) | Radix Cyathulae (Radix Achyranthes)                            |
| Du Zhong             | <i>Eucommia ulmoides</i> Oliv                                  | Cortex Eucommiae                                               |
| Yi Mu Cao            | <i>Leonurus heterophyllus</i> Sweet                            | Herba Leonuri                                                  |
| Sang Ji Sheng        | <i>Taxillus chinensis</i> (DC.) Danser                         | Herba Taxilli                                                  |
| Ye Jiao Teng         | Caulis Polygoni Multiflori (Polygonum multiflorum Thunb.)      | Tuber Fleeceflower Stem                                        |
| Fu Shen              | <i>Poria cum Radix Pini</i>                                    | Poria with Hostwood                                            |
| Long Gu              | <i>Fossilia Ossia Mastodi</i>                                  | Os Draconis                                                    |
| Mu Li                | <i>Ostrea gigas</i> Thunberg                                   | Concha Ostreae                                                 |
| Ban Xia              | <i>Pinellia ternata</i>                                        | Rhizoma Pinelliae                                              |
| Bai Zhu              | <i>Atractylodes macrocephala</i> Koidz                         | Rhizoma Atractylodis Macrocephalae                             |
| Fu Ling              | <i>Poria cocos</i> (Schw.)Wolf                                 | Poria                                                          |
| Ju Hong              | <i>Citrus grandis</i> (L.) Osbeck (Citrus reticulata Blanco)   | Exocarpium Citri Grandis (Exocarpium Citri Reticulatae rubrum) |

---

|               |                                                                          |                                |
|---------------|--------------------------------------------------------------------------|--------------------------------|
| Sheng Di      | <i>Rehmannia glutinosa</i><br>Libosch                                    | Radix Rehmanniae               |
| Dang Gui      | <i>Angelica sinensis</i><br>( <i>Angelica sinensis</i> (Oliv.)<br>Diels) | Radix Angelicae Sinensis       |
| Chuan Xiong   | <i>Ligusticum chuanxiong</i><br>Hort.                                    | Rhizoma Chuanxiong             |
| Tao Ren       | <i>Prunus persica</i> (L.) Batsch                                        | Semen Persicae                 |
| Hong Hua      | <i>Carthamus tinctorius</i> L.                                           | Flos Carthami                  |
| Dai Zhe Shi   | Haematitum                                                               | Haematitum                     |
| Gui Ban       | <i>Chinemys reevesii</i> (Grey)                                          | Carapax Et Plastrum Testudinis |
| Bai Shao      | <i>Paeonia lactiflora</i> Pall.                                          | Radix Paeoniae Alba            |
| Xuan Shen     | <i>Scrophularia ningpoensis</i><br>Hemsl.                                | Radix Scrophulariae            |
| Tian Dong     | <i>Asparagus cochinchinensis</i><br>(Lour.) Merr.                        | Radix Asparagi                 |
| Chuan Lian Zi | <i>Melia toosendan</i> Sieb. and<br>Zucc.                                | Fructus Toosendan              |
| Yin Chen      | <i>Artemisia capillaris</i> Thunb.                                       | Herba Artemisiae Scopariae     |
| Mai Ya        | <i>Hordeum vulgare</i> L.                                                | Fructus Hordei Germinatus      |
| Gan Cao       | <i>Glycyrrhiza uralensis</i><br>Fisch.                                   | Radix Glycyrrhizae             |
| Huang Qi      | <i>Astragalus membranaceus</i><br>(Fisch.)                               | Radix Astragali                |
| Di Long       | <i>Pheretima aspergillum</i><br>(E. Perrier)                             | Pheretima                      |
| Chi Shao      | <i>Paeonia lactiflora</i> Pall.                                          | Radix Paeoniae Rubra           |
| Shi Chang Pu  | <i>Acorus tatarinowii</i> Schott.                                        | Rhizoma Acori Tatarinowii      |
| Yi Zhi Ren    | <i>Alpinia oxyphylla</i> Miq.                                            | Fructus Alpiniae Oxyphyllae    |
| Yuan Zhi      | <i>Polygala tenuifolia</i> Willd.                                        | Radix Polygalae                |
| Chai Hu       | <i>Bupleurum chinense</i> DC.                                            | Radix Bupleuri                 |

---

---

|        |                                                                                           |                |
|--------|-------------------------------------------------------------------------------------------|----------------|
| Yu Jin | Curcuma rchenyujin Y. H.<br>Chenet C.Ling<br>(Curcuma wenyujin Y. H.<br>Chen and C. Ling) | Radix Curcumae |
| Bai He | Lilium brownii F.E. Brown<br>var. viridulum Baker                                         | Bulbus Lili    |

---
